# Supplementary material for: Analysis of Various Types of Glomerulonephritis with Crescents at a Single Center
Source: Int J Nephrol. 2022 May 9;2022:1749548. doi: 10.1155/2022/1749548 (PMC9110247; doi:10.1155/2022/1749548)
Supplement: Supplementary Materials — Supplementary Table 1: Univariate and multivariate analysis of factors affecting renal prognosis microscopic polyangiitis. Supplementary Table 2: Clinical score, clinical grade, and treatment regimen for microscopic polyangiitis therapy in Japan. [file 1749548.f1.xlsx]

## Sheet: Supple 1
	Univariate analysis			Multivariate analysis
	HR	95% CI	P value	HR	95% CI	P value
Age (15 years increase)	1.2	0.56–2.58	0.6324
Male (vs. female)	1.07	0.22–5.17	0.9317
MAP (10 mm Hg increase)	2.05	0.98–4.25	0.0409
BMI (3 kg/m2 increase)	1.15	0.61–2.16	0.6678
eGFR (30 mL/min/1.73m2 decrease)	4.75	0.69–32.7	0.0319
T-chol (30 mg/dL increase)	0.49	0.25–0.97	0.0223
TG (30 mg/dL increase)	0.64	0.10–4.21	0.6186
U-Prot (0.5 g/g Cr increase)	1.15	0.85–1.56	0.3706
U-RBC (25 counts/HPF increase)	0.79	0.35–1.76	0.5429
ACEI/ARB use (vs. non-use)	0.64	0.11–3.61	0.6104
Antiplatelet drugs use (vs. non-use)	2.65	0.39–18.0	0.3115
Percentage of global glomerulosclerosisa	26.3	2.38–291	<0.0001	21.6	1.69–275	0.0008
Percentage of crescentsb (cellular/fibrocellular/fibrous)	1.39	0.60–3.21	0.4341
Tubular atrophy and interstitial fibrosisc	5.97	1.18–30.2	0.0073	2.76	0.53–14.5	0.1645
Percentage of normal glomerulid	0.2	0.04–0.97	0.0153
Arteriosclerosis scoree	1.53	0.68-3.60	0.2978
Arteriolosclerosis scoree	2.93	1.04-10.0	0.0413
HR, hazard ratio; CI, confidence interval; MPA, microscopic polyangiitis; IgA-N, immunoglobulin A nephropathy;
MAP, mean arterial pressure; BMI, body mass index; Alb, serum albumin; eGFR, estimated glomerular filtration rate;
T-chol, total cholesterol; TG, triglycerides; U-Prot, total urine protein; U-RBC, urine red blood cell count;
ACEI, angiotensin-converting enzyme inhibitor; ARB, angiotensin II receptor blocker
aGlobal glomerulosclerosis score: < 10%, 0; 10 ≦ lesion <25%, 1; 25≦ lesion < 50%, 2; 50 ≦ lesion <75%, 3; ≧ 75%, 4
bCrescent score: < 10%, 0; 10 ≦ lesion < 25%, 1; 25 ≦ lesion < 50%, 2; 50 ≦ lesion <75%, 3; ≧ 75%, 4
cTubular atrophy and interstitial fibrosis score: < 5%, 0; 5 ≦ lesion < 20, 1; 20 ≦ lesion < 50, 2; ≧ 50, 3
dNormal glomeruli score: > 75%, 0; 50 < lesion ≦ 75, 1; 25 < lesion ≦ 50, 2; ≦ 25, 3
eArteriosclerosis and arteriolosclerosis score: none or low 0 , middle 1 , high 2 , very high 3

## Sheet: Supple 2 MPA
Clinical score	Serum creatinine (mg/dL)	Age (years)	Lung involvement	Serum CRP (mg/dL)		Regimen							Clincical grade	Over 70 years old or ESRD	Under 70 years old or non ESRD
0	< 3	< 60	Negative	< 2.6		A	OCS						Ⅰ or Ⅱ	A	B
1	3 ≦ Cre < 6	60-69		2.6-10.0			(PSL 0.6-1.0mg/kg/day)						Ⅲ or Ⅳ	B	C
2	6 ≦ Cre	≧ 70	Positive	> 10.0		B	MP + OCS
3	ESRD						(MP : 500-1000mg/dayx3 + OCS : PSL 0.6-0.8mg/kg/day)
Clinical grade	Total score					C	MP + OCS + CYC or IVCY
Ⅰ	0-2						(MP : 500-1000mg/dayx3)
Ⅱ	3-5						(PSL : 0.6-0.8mg/kg/day)
Ⅲ	6-7						(CYC : 25-100mg/day or IVCY : 250-750mg/m2/day/month)
Ⅳ	8-9
ESRD, dialysis-dependent end stage renal disease
OCS, oral corticosteroid
MP, methylprednisolone
PSL, prednisolone
CYC, cyclophsphamide
IVCY, intravenous cyclophosphamide
